# Supplementary material for: Optimization of HS-SPME-GC/MS Analysis of Wine Volatiles Supported by Chemometrics for the Aroma Profiling of Trebbiano d’Abruzzo and Pecorino White Wines Produced in Abruzzo (Italy)
Source: MDPI journal article supplement (doi:10.3390/molecules28041534), 2023-02-05
Supplement: s1 [file s1]

**Table S1.** Retention time (RT) and experimental (exp) and literature (lit) retention index (RI) of each volatile compound; volatile profiles of PEC and TRE wine samples collected with the DVB/CAR/PDMS fiber under the optimized conditions: mean relative peak area (%) of each compound in the GC chromatogram with the related standard error in brackets.

| RT(min) | RI   |           | compound                                            | Peak area (%)  |              |
|---------|------|-----------|-----------------------------------------------------|----------------|--------------|
|         | exp  | lit       |                                                     | PEC (n = 7)    | TRE (n = 6)  |
| 1.99    | 593  | 611       | ethyl acetate                                       | -              | -            |
| 2.15    | 611  | 625       | 2-methyl-1-propanol                                 | 0.49(0.18)     | 0.24(0.06)   |
| 2.58    | 647  | 650       | butanol                                             | 0.11(0.10)     | 0.81(0.79)   |
| 3.35    | 705  | 709       | ethyl propanoate                                    | 0.31(0.19)     | 0.028(0.004) |
| 3.74    | 718  | 726       | 1,1-diethoxyethane                                  | 0.07(0.03)     | 0.04(0.02)   |
| 3.98    | 726  | 736       | 3-methyl-1-butanol                                  | 7.5(0.4)       | 9.7(1.4)     |
| 4.08    | 730  | 739       | 2-methyl-1-butanol                                  | 0.29(0.04)     | 0.60(0.09)   |
| 4.65    | 749  | 755       | ethyl 2-methylpropanoate                            | 0.046(0.005)   | 0.08(0.02)   |
| 5.62    | 782  | 788       | 1,3-butandiole/2,3-butandiole                       | 0.12(0.03)     | 0.32(0.08)   |
| 6.06    | 797  | 788       | 1,3-butandiole/2,3-butandiole                       | 0.024(0.007)   | 0.051(0.020) |
| 6.22    | 802  | 802       | ethyl butanoate                                     | 0.28(0.03)     | 0.22(0.05)   |
| 6.68    | 813  | 815       | ethyl lactate                                       | 0.18(0.05)     | 0.50(0.16)   |
| 7.50    | 833  | 833       | 2-furfural                                          | 0.04(0.02)     | 0.05(0.02)   |
| 7.95    | 844  | 863       | 3-methylbutanoic acid                               | 0.007(0.002)   | 0.003(0.001) |
| 8.07    | 847  | 846       | 4-methyl-1-pentanol                                 | 0.007(0.002)   | 0.009(0.002) |
| 8.20    | 850  | 849       | ethyl 2-methylbutanoate                             | 0.013(0.003)   | 0.017(0.002) |
| 8.41    | 855  | 854       | ethyl 3-methylbutanoate                             | 0.036(0.004)   | 0.043(0.004) |
| 9.07    | 871  | 868       | 1-hexanol                                           | 0.14(0.02)     | 0.23(0.03)   |
| 9.36    | 878  | 876       | 3-methyl-1-butyl-acetate                            | 2.8(0.2)       | 2.1(0.3)     |
| 9.43    | 880  | 880       | 2-methyl-1-butyl acetate                            | 0.07(0.01)     | 0.07(0.01)   |
| 9.79    | 889  | 893       | 2-methyl 2,3-pentandiol                             | 0.011(0.003)   | 0.008(0.004) |
| 10.71   | 911  | 914/915   | 4-methyldihydrofuran-2(3H)-one/butyrolactone        | 0.003(0.002)   | 0.008(0.003) |
| 10.83   | 914  | 920       | anisole                                             | 0.001(0.001)   | 0.04(0.04)   |
| 12.65   | 961  | 962       | benzaldehyde                                        | 0.21(0.06)     | 0.2(0.1)     |
| 13.40   | 981  | 990       | hexanoic acid                                       | 0.53(0.18)     | 0.64(0.04)   |
| 14.10   | 999  | 1000      | ethyl hexanoate                                     | 6.1(0.2)       | 6.9(0.6)     |
| 14.59   | 1013 | 1011      | hexyl acetate                                       | 0.38(0.06)     | 0.32(0.07)   |
| 15.02   | 1025 | 1027      | limonene                                            | -              | -            |
| 15.15   | 1029 | 1030      | 2-ethyl hexanol                                     | 0.003(0.002)   | 0.004(0.002) |
| 15.37   | 1035 | 1036      | benzyl alcohol                                      | 0.06(0.03)     | 0.04(0.03)   |
| 15.72   | 1045 | 1045      | (E)-2-hexenoic acid                                 | 0.016(0.003)   | 0.027(0.004) |
| 16.11   | 1056 | 1056      | 3-methyl-1-butylbutanoate/pentyl 2-methylpropanoate | 0.014(0.002)   | 0.024(0.004) |
| 16.65   | 1071 | 1071      | 1-octanol                                           | 0.019(0.002)   | 0.031(0.003) |
| 17.04   | 1082 | 1085      | guaiacol (o-methoxyphenol)                          | 0.0004(0.0004) | 0.005(0.003) |
| 17.31   | 1090 | 1092      | 2-nonanone                                          | 0.005(0.001)   | 0.008(0.001) |
| 17.50   | 1095 | 1097      | ethyl eptanoate                                     | -              | -            |
| 17.60   | 1098 | 1099      | lynalol                                             | 0.058(0.008)   | 0.06(0.01)   |
| 17.82   | 1104 | 1105/1104 | 2-nonen-1-ol/nonanal                                | 0.03(0.01)     | 0.08(0.03)   |
| 18.05   | 1112 | 1116      | 2-phenyl ethanol                                    | 1.9(0.2)       | 2.9(0.4)     |
| 18.41   | 1123 | 1126      | methyl octanoate                                    | 0.035(0.004)   | 0.034(0.005) |
| 20.00   | 1172 | 1180      | octanoic acid                                       | --             | -            |
| 20.19   | 1178 | 1182      | diethyl succinate                                   | 1.7(0.2)       | 1.9(0.2)     |

|       |      |           |                                                |              |              |
|-------|------|-----------|------------------------------------------------|--------------|--------------|
| 20.72 | 1195 | 1196      | ethyl octanoate                                | 42.4(0.7)    | 46(3)        |
| 21.04 | 1205 | 1206      | decanal                                        | 0.08(0.04)   | 0.18(0.06)   |
| 22.15 | 1242 | 1246      | ethyl phenylacetate                            | 0.040(0.008) | 0.10(0.02)   |
| 22.34 | 1249 | 1252      | isopenthyl hexanoate                           | 0.092(0.009) | 0.10(0.01)   |
| 22.51 | 1254 | 1258      | 2-phenylethyl acetate                          | 0.51(0.05)   | 0.43(0.03)   |
| 22.74 | 1262 | 1271      | diethyl 2-hydrosuccinate                       | 0.033(0.007) | 0.04(0.01)   |
| 23.02 | 1273 | 1270      | 1-decanol                                      | 0.019(0.005) | 0.04(0.01)   |
| 23.28 | 1280 | 1281      | vitispirane                                    | 0.21(0.04)   | 0.36(0.08)   |
| 23.57 | 1290 | 1290      | propyl octanoate                               | 0.041(0.004) | 0.031(0.004) |
| 24.08 | 1308 | 1313      | phthalic anhydride                             | 0.025(0.009) | 0.05(0.01)   |
| 24.48 | 1322 | 1325      | methyl decanoate                               | 0.031(0.004) | 0.05(0.01)   |
| 25.13 | 1345 | 1348      | butyl octanoate                                | 0.022(0.002) | 0.026(0.003) |
| 25.40 | 1355 | 1354      | 1,1,6-trimethyl-1,2-dihydronaphtalene          | 0.10(0.02)   | 0.16(0.04)   |
| 25.71 | 1366 | 1373      | decanoic acid                                  | 0.59(0.05)   | 0.34(0.10)   |
| 26.12 | 1380 | 1387      | 3-dodecanone                                   | 0.16(0.04)   | 0.15(0.03)   |
| 26.23 | 1384 | 1387      | ethyl 9-decenoate                              | 0.83(0.44)   | 0.65(0.18)   |
| 26.45 | 1392 | 1396      | ethyl decanoate                                | 28.3(0.09)   | 19.5(1.7)    |
| 27.35 | 1425 | 1425      | 3,3-dimethylbutan-2-yl ethyl succinate         | 0.046(0.006) | 0.088(0.008) |
| 27.82 | 1442 | 1446      | 3-methylbutyl octanoate                        | 0.46(0.05)   | 0.53(0.05)   |
| 28.30 | 1459 | 1466      | 2,5-di-tert-butylcyclohexa-2,5-diene-1,4-dione | 0.13(0.03)   | 0.09(0.02)   |
| 28.64 | 1472 | 1468/1473 | 2-dodecenale (E)/dodecanol                     | 0.022(0.005) | 0.027(0.008) |
| 29.46 | 1502 | 1513      | 2,5-diterbutyl phenol                          | 0.016(0.002) | 0.08(0.05)   |
| 30.84 | 1562 | 1564      | nerolidol                                      | 0.022(0.004) | 0.012(0.005) |
| 31.52 | 1592 | 1595      | ethyl dodecanoate                              | 1.09(0.17)   | 0.30(0.14)   |
| 32.42 | 1641 | 1646      | isoamyl decanoate                              | -            | -            |
| 32.49 | 1645 | 1646      | 3-methylbutyl pentadecanoate                   | 0.21(0.10)   | 0.29(0.10)   |
| 35.64 | 1853 | 1837      | galaxolide                                     | -            | -            |
| 35.74 | 1861 | 1870      | 2-methylpropyl phthalate                       | -            | -            |

**Table S2.** Adjusted determination coefficients in fitting ( $R^2_{adj}$ ) and leave-one-out cross validation ( $Q^2_{adj}$ ), and ANOVA for the response surface model of the total area of the GC chromatogram ( $A_{TOT}$ ), and peak areas of ethyl decanoate ( $A_{ED}$ ) and 3-methyl-1-butanol ( $A_{MB}$ ) collected with the PDMS and DVB/CAR/PDMS fibers.

| Fiber | Response                | $R^2_{adj}$ | $Q^2_{adj}$ | Variation source | SS <sup>a</sup> | DF <sup>b</sup> | MS <sup>c</sup> | F-value | Prob-F  |
|-------|-------------------------|-------------|-------------|------------------|-----------------|-----------------|-----------------|---------|---------|
| PDMS  | $A_{TOT} \cdot 10^{-6}$ | 0.9343      | 0.8089      | Model            | 139.945         | 8               | 17.494          | 24.092  | 0.0014  |
|       |                         |             |             | Residual         | 3.631           | 5               | 0.726           |         |         |
|       |                         |             |             | Lack of fit      | 3.286           | 4               | 0.822           | 2.385   | 0.4474  |
|       |                         |             |             | Pure error       | 0.344           | 1               | 0.344           |         |         |
|       |                         |             |             | Total            | 143.585         | 13              |                 |         |         |
| PDMS  | $A_{ED} \cdot 10^{-6}$  | 0.8767      | 0.5625      | Model            | 16.644          | 8               | 2.081           | 12.558  | 0.0064  |
|       |                         |             |             | Residual         | 0.828           | 5               | 0.166           |         |         |
|       |                         |             |             | Lack of fit      | 0.828           | 4               | 0.207           | 459.961 | 0.0350  |
|       |                         |             |             | Pure error       | 0.0005          | 1               | 0.0005          |         |         |
|       |                         |             |             | Total            | 17.473          | 13              |                 |         |         |
| PDMS  | $A_{MB} \cdot 10^{-6}$  | 0.9544      | 0.9365      | Model            | 2.215           | 3               | 0.739           | 91.639  | <0.0001 |
|       |                         |             |             | Residual         | 0.081           | 10              | 0.008           |         |         |
|       |                         |             |             | Lack of fit      | 0.048           | 5               | 0.010           | 1.510   | 0.3311  |
|       |                         |             |             | Pure error       | 0.032           | 5               | 0.006           |         |         |
|       |                         |             |             | Total            | 2.295           | 13              |                 |         |         |

|              |                         |        |        |             |         |   |        |        |        |
|--------------|-------------------------|--------|--------|-------------|---------|---|--------|--------|--------|
| DVB/CAR/PDMS | $A_{TOT} \cdot 10^{-6}$ | 0.8542 | 07385  | Model       | 249.529 | 4 | 62.382 | 12.714 | 0.0152 |
|              |                         |        |        | Residual    | 19.627  | 4 | 4.907  |        |        |
|              |                         |        |        | Total       | 269.156 | 8 |        |        |        |
| DVB/CAR/PDMS | $A_{ED} \cdot 10^{-6}$  | 0.8869 | 0.7964 | Model       | 40.003  | 4 | 10.001 | 16.687 | 0.0092 |
|              |                         |        |        | Residual    | 2.397   | 4 | 0.599  |        |        |
|              |                         |        |        | Total       | 42.400  | 8 |        |        |        |
| DVB/CAR/PDMS | $A_{MB} \cdot 10^{-6}$  | 0.9520 | 0.8669 | Model       | 2.461   | 3 | 0.820  | 53.852 | 0.0003 |
|              |                         |        |        | Residual    | 0.076   | 5 | 0.015  |        |        |
|              |                         |        |        | Lack of fit | 0.014   | 1 | 0.014  | 0.891  | 0.3987 |
|              |                         |        |        | Pure error  | 0.062   | 4 | 0.016  |        |        |
|              |                         |        |        | Total       | 2.537   | 8 |        |        |        |

<sup>a</sup> Sum of squares  
<sup>b</sup> Degrees of freedom  
<sup>c</sup> Media of the squares
